# Supplementary material
Source: PubMed Central journal article supplement (PMC4128864)
Supplement: cbt-15-1219-s01.pdf [file cbt-15-1219-s01.pdf]

## **Supplemental Material to:**

**Elisa Bergantin, Carmelo Quarta, Cristina Nanni,  
Stefano Fanti, Andrea Pession, Giorgio Cantelli Forti,  
Patrizia Hrelia, and Roberto Tonelli**

**Sulforaphane induces apoptosis in rhabdomyosarcoma  
and restores TRAIL-sensitivity in the aggressive alveolar  
subtype leading to tumor elimination in mice**

**Cancer Biology & Therapy 2014; 15(9)**

**<http://dx.doi.org/10.4161/cbt.29684>**

**<http://www.landesbioscience.com/journals/cbt/article/29684/>**

**Table S1.** Primer list sequence

| <b>Gene</b> | <b>Primer sequence (forward)</b> | <b>Primer sequence (reverse)</b> |
|-------------|----------------------------------|----------------------------------|
| PAX-FKHR    | 5'-ACCAGCTGTC GGAGACCTCT TA-3'   | 5'-CTGTGGATTG AGCATCCACC-3'      |
| PAX3        | 5'-GCACTGTACA CCAAAGCACG-3'      | 5'-TACCTGAGGT GAGAGGCCAT TG-3'   |
| MET         | 5'-GCGCCGTGAT GAATATCGAA-3'      | 5'-GAGGGTTGA TGGTCCTGAT-3'       |
| MYCN        | 5'-CGACCACAAG GCCCTCAGT-3'       | 5'-TGACCACGTC GATTCTTCC T-3'     |
| p21         | 5'-GGACAGCAGA GGAAGACCAT-3'      | 5'-TAGGGCTTCC TCTTGAGAA-3'       |
| DR5         | 5'-CAAAAGAGGT CCAGCCCCTC A-3'    | 5'-TTCTGGTCGT GGTGCAGGGA-3'      |
| ACTB        | 5'-TCCTCCCTGG AGAAGAGCTA CGAG-3' | 5'-ACACGGAGTA CTTGCGCTCAG G-3'   |
| GAPDH       | 5'-CCAATATGAT TCCACCCATG GC-3'   | 5'-CTTGATTTTC GAGGGATCTC GC-3'   |
